# Supplementary material
Source: PubMed Central journal article supplement (PMC3251513)
Supplement: NIHMS291449-supplement-01.pdf [file NIHMS291449-supplement-01.pdf]

**Supplemental Table 1. Selected Characteristics of the Study Population, by Antihypertensive Medication Use, National Longitudinal Study of Adolescent Health, 1994 - 2008**

| Characteristic              | Medication Users<br>(n = 340) |                | Non-Medication Users<br>(n = 9,706) |                |
|-----------------------------|-------------------------------|----------------|-------------------------------------|----------------|
|                             | kg                            | % <sup>a</sup> | kg                                  | % <sup>a</sup> |
| <b>Females Only</b>         |                               |                |                                     |                |
| Race/Ethnicity              |                               |                |                                     |                |
| Non-Hispanic White          |                               | 67.8           |                                     | 73.2           |
| Mexican-Origin Latino       |                               | 3.7            |                                     | 7.3            |
| Non-Hispanic Black          |                               | 27.4           |                                     | 16.1           |
| Asian/Pacific Islander      |                               | 1.1            |                                     | 3.4            |
| Birth Weight Distribution   |                               |                |                                     |                |
| 25 <sup>th</sup> Percentile | 2.92                          |                | 2.95                                |                |
| 50 <sup>th</sup> Percentile | 3.34                          |                | 3.35                                |                |
| 75 <sup>th</sup> Percentile | 3.64                          |                | 3.66                                |                |
| Number of observations      |                               | 153            |                                     | 4,802          |
| <b>Males Only</b>           |                               |                |                                     |                |
| Race/Ethnicity              |                               |                |                                     |                |
| Non-Hispanic White          |                               | 76.7           |                                     | 72.8           |
| Mexican-Origin Latino       |                               | 5.6            |                                     | 8.1            |
| Non-Hispanic Black          |                               | 15.0           |                                     | 15.6           |
| Asian/Pacific Islander      |                               | 2.7            |                                     | 3.4            |
| Birth Weight Distribution   |                               |                |                                     |                |
| 25 <sup>th</sup> Percentile | 2.92                          |                | 3.05                                |                |
| 50 <sup>th</sup> Percentile | 3.44                          |                | 3.41                                |                |
| 75 <sup>th</sup> Percentile | 3.78                          |                | 3.82                                |                |
| Number of observations      |                               | 187            |                                     | 4,904          |

Abbreviations: %, percent; kg, kilograms

<sup>a</sup> weighted percent
